# Supplementary material
Source: PubMed Central journal article supplement (PMC3437867)
Supplement: 1207901109_pnas.201207901SI.pdf [file 1207901109_pnas.201207901SI.pdf]

# Supporting Information

Rodriguez-Menchaca et al. 10.1073/pnas.1207901109

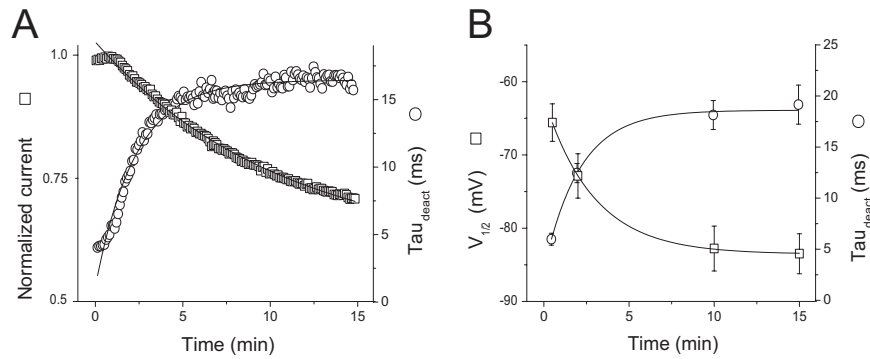

**Fig. S1.** Distinct kinetics of the current rundown and of the gating shift of Kv1.2 channels recorded in ND96K under inside-out patch conditions. (A) Time constants for Kv1.2 current rundown (squares) and deactivation kinetics ( $\tau_{deact}$ ) (circles). Lines are fits of a single exponential function to the data with values for time constant ( $\tau$ ) of  $10.68 \pm 0.27$  min and  $2.3 \pm 0.1$  min for rundown and  $\tau_{deact}$  respectively. (B) Time constants for the midpoint of voltage activation ( $V_{1/2}$ ) and  $\tau_{deact}$  as a function of time. Data adjusted to a single exponential gave a time constant ( $\tau$ ) of  $2.9 \pm 1.9$  min and  $2.9 \pm 0.6$  min for  $V_{1/2}$  and  $\tau_{deact}$ , respectively. Data shown are  $\pm$  SEM;  $n = 4$ .

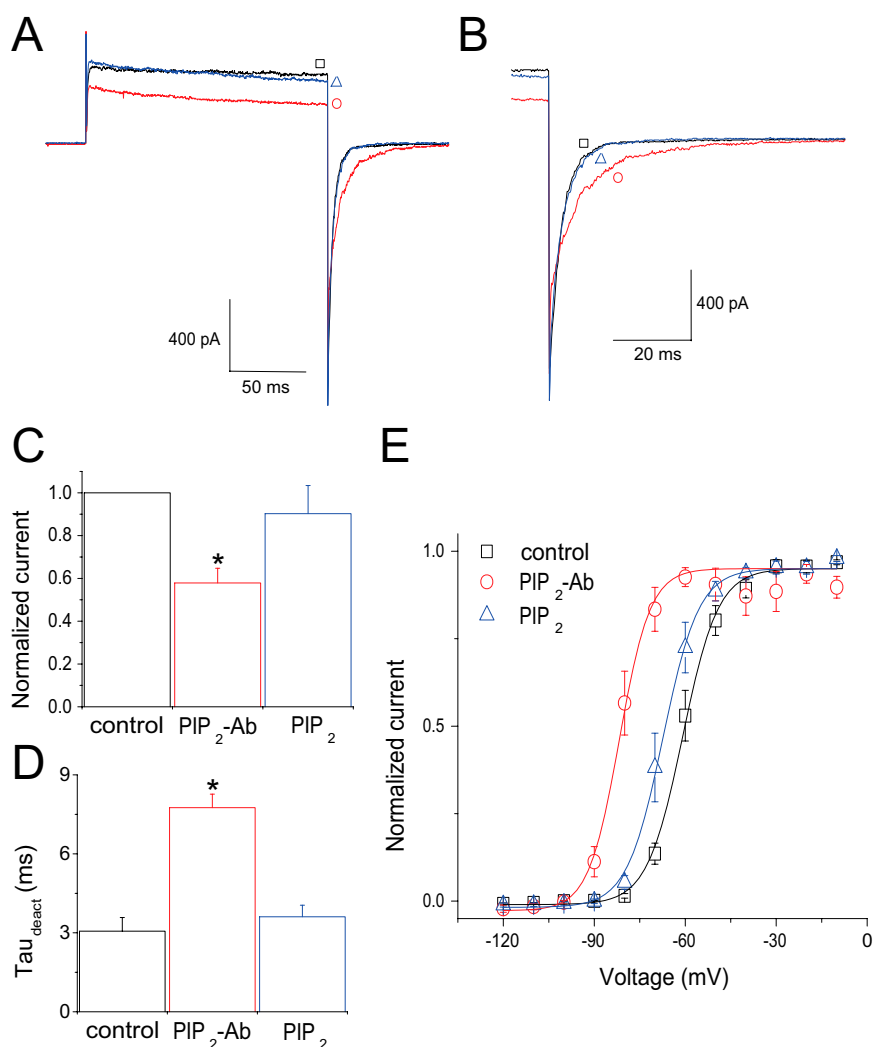

**Fig. S2.** PIP<sub>2</sub>-Ab-mediated effects on voltage-dependent gating and current amplitude of *Shaker* channels are reversed by PIP<sub>2</sub>, just as in Kv1.2 channels. (A) Representative traces showing effects of PIP<sub>2</sub>-Ab (blue) and PIP<sub>2</sub> (red) on currents in *Shaker* channels in which the inactivation domain was removed (Shk-IR). Black trace represents control channel. (B) Deactivation of Shk-IR tail currents in control channels (black) and with PIP<sub>2</sub>-Ab (red) and PIP<sub>2</sub> (blue) application. (C) Summary of the effects of PIP<sub>2</sub>-Ab and PIP<sub>2</sub> on current amplitude. Data shown are  $\pm$  SEM;  $n = 5$ . (D) Summary of the time constants of deactivation ( $\tau_{\text{deact}}$ ) from tail currents, similar to those shown in *B*, in control channels and with PIP<sub>2</sub>-Ab or PIP<sub>2</sub> application. Data shown are  $\pm$  SEM;  $n = 5$ . (E) Steady-state activation curves of *Shaker* channels determined before (control, black) and after application of 10  $\mu\text{g/mL}$  PIP<sub>2</sub>-Ab (red) and during subsequent application of 10  $\mu\text{M}$  PIP<sub>2</sub> (blue). Data points are mean  $\pm$  SEM;  $n = 5$ . Lines are fits of a Boltzmann function to the data. \* $P < 0.05$  versus control.

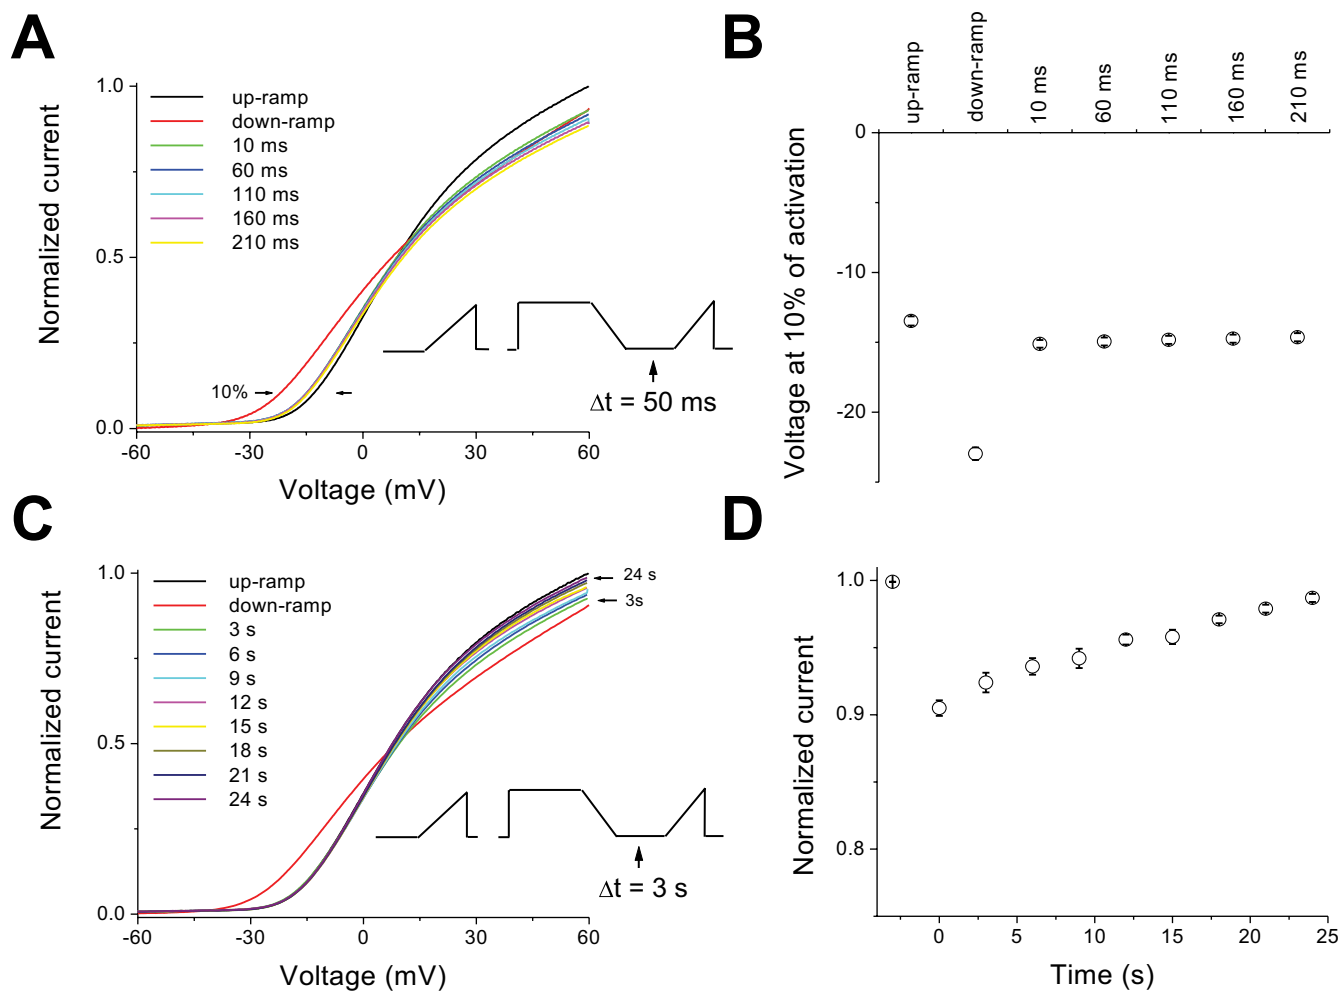

**Fig. 53.** Distinct recovery kinetics of the shift in voltage dependence and change in current amplitude following  $\text{PIP}_2$  depletion by *Ciona intestinalis* voltage-sensitive phosphatase (Ci-VSP). (A) Representative current–voltage relationships of Kv1.2 channels coexpressed with Ci-VSP evoked by the protocol illustrated in the *Inset*. (B) Temporal course of the shift recovery as a function of the repolarization duration. Data shown are  $\pm$  SEM;  $n = 5$ . (C) Representative current–voltage relationships of Kv1.2 channels coexpressed with Ci-VSP evoked by the protocol illustrated in the *Inset*. (D) Temporal course of current amplitude recovery as a function of the repolarization duration. Data shown are  $\pm$  SEM;  $n = 5$ .



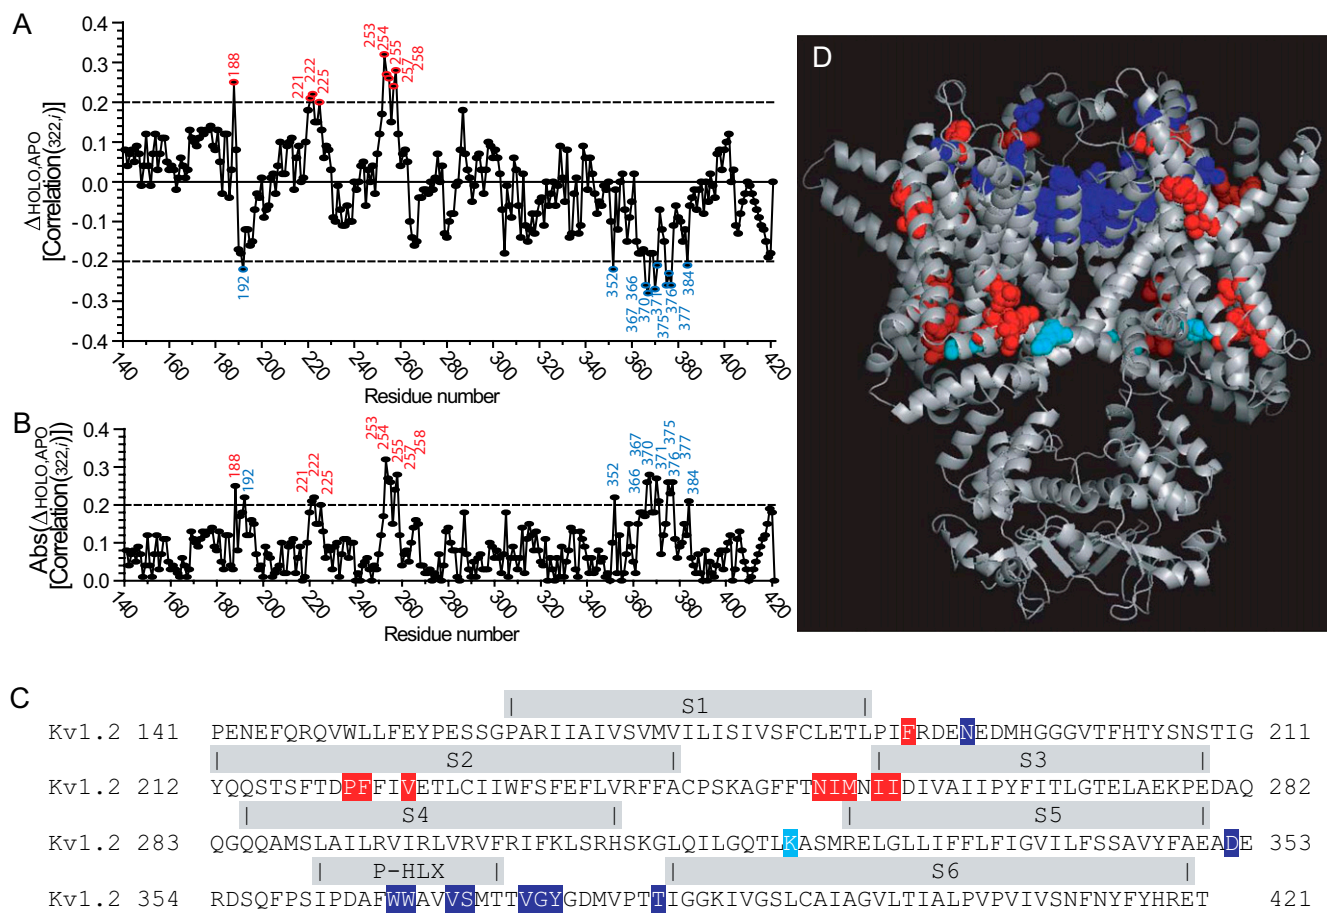

**Fig. S5.** Changes in the correlated motions of K322 with the transmembrane residues in the presence of PIP<sub>2</sub>. Correlation analysis was conducted on trajectories of 50–100 ns in the presence and absence of PIP<sub>2</sub>. Correlation values range between –1 and 1. The larger the absolute value of the correlation between two residues, the larger is their correlation. Using K322 to represent the S4–S5 linker, we calculated the correlation between K322 and all transmembrane residues in the presence and absence of PIP<sub>2</sub>. The differences in these correlations with and without PIP<sub>2</sub> are depicted in **A** as a function of the transmembrane residue number. **B** depicts the absolute values of the differences shown in **A**. The residues that exhibit maximal absolute differences ( $\geq 0.2$ ) in the correlated motions are labeled on both panels, and their location in the sequence is shown in **C**. Residues colored red exhibit maximal increased correlation in the presence of PIP<sub>2</sub>. Residues colored blue exhibit maximal decreased correlation. These residues are shown with the same color-coding in a 3D model of the open channel conformation in **D**.
